# Supplementary material
Source: MDPI journal article supplement (https://www.mdpi.com/2071-1050/15/21/15373)
Supplement: s1 [file s1]

Table S1. Essential oil compounds in chamomile flowers dried on air exposed to direct sun for 4 days (SUN), on air exposed to shadow (SH), dried in a drier at 105°C for 24 hours (D), and drying in the climate chamber.

| Compound                                               | Abbreviation | SUN      |          | SH     |          | D        |          | KK-60    |          |
|--------------------------------------------------------|--------------|----------|----------|--------|----------|----------|----------|----------|----------|
|                                                        |              | %        | sd       | %      | sd       | %        | sd       | %        | sd       |
| Sabinene                                               | SAB          | 0,185    | 0,049497 | 0,2    | 0,08165  | nd       |          | nd       |          |
| Pentyl furan<2->                                       | PFU          | nd       |          | nd     |          | nd       |          | 0,1      | 0        |
| Yomogi alcohol                                         | YAL          | 0,1525   | 0,049917 | 0,125  | 0,05     | nd       |          | 0,1      | 0        |
| Cymene<para->                                          | PCYM         | 0,1      | 0,042426 | 0,12   | 0,04     | nd       |          | nd       |          |
| Cineole<1,8->                                          | CIN          | nd       |          | 0,085  | 0,021213 | nd       |          | nd       |          |
| Ocimene<(Z)-beta->                                     | ZBOC         |          |          | 0,1    |          | nd       |          | nd       |          |
| Ocimene<(E)-beta->                                     | EBOC         | 0,37     | 0,325269 | 0,2075 |          | nd       |          | nd       |          |
| Artemisia ketone                                       | AKET         | 0,613333 | 0,407962 | 0,65   | 0,129099 | nd       |          | nd       |          |
| Artemisia alcohol                                      | AAL          | 0,2875   | 0,23429  | 0,2    |          | nd       |          | nd       |          |
| Artemisyl acetate                                      | AAC          | nd       |          | 0,1    |          | nd       |          | nd       |          |
| Hexenyl 3-methyl<br>butanoate<3Z->                     | HMB          | 0,09     | 0,014142 | 0,095  | 0,01     | nd       |          | nd       |          |
| 4,8-dimethylnona-3,8-dien-<br>2-one (69, 166, RI 1270) | DDO          | 0,095    | 0,035355 | 0,1    | 0        | 0,2      | 3,40E-17 | 0,1      | 0        |
| Elemene<delta->                                        | DEL          | nd       |          | nd     |          | 0,1      | 0        | nd       |          |
| Ylangene<alpha->                                       | AYL          | nd       |          | nd     |          | nd       |          | nd       |          |
| Isocomene<alpha->                                      | AIC          | 0,3      |          | 0,1    | 0        | 0,12     | 0,034641 | 0,1      | 0        |
| Elemene<beta->                                         | BELEM        |          |          | 0,095  | 0,007071 | nd       |          | nd       |          |
| Caryophyllene(E-)                                      | BCAR         | 0,245    | 0,055076 | 0,275  | 0,05     | 0,276667 | 0,040415 | 0,2      | 0        |
| Farnesene<(E)-beta->                                   | BFAR         | 15,885   | 2,097276 | 21,425 | 1,65737  | 25,45    | 1,109054 | 22,75    | 0,974679 |
| Sesquicineole<dehydro->                                | SCIN         | 0,5225   | 0,170171 | 0,475  | 0,05     | 0,41     | 0,02     | 0,7      | 0,08165  |
| Dauca-5,8-diene                                        | DAU          | nd       |          | nd     |          | 0,2      | 0        | nd       |          |
| Murolene<gama->                                        | GMUU         | 2,185    | 0,315225 | 2      | 0,270801 | 4,0575   | 0,178582 | 3,5      | 0,244949 |
| Himachalene<gamma->                                    | GHIM         | 0,423333 | 0,120968 | 0,5    | 0        | 0,495    | 0,01     | 0,4      | 0        |
| Bicyclogermacrene                                      | BCGER        | 0,483333 | 0,253837 | 0,55   | 0,129099 | 1,2575   | 0,115839 | 0,875    | 0,05     |
| Murolene<alpha->                                       | AMUU         | nd       |          | nd     |          | 0,1      | 0        | 0,1      | 0        |
| Bisabolene<(Z)-alpha->                                 | ABISEN       | 0,13     | 0,051962 | 0,2    | 0        | 0,5325   | 0,04717  | 0,4      | 0        |
| Cadinene<gamma->                                       | GCAD         | 0,1      |          | 0,1    | 0        | 0,206667 | 0        | 0,1      | 0        |
| Cadinene<delta->                                       | DCAD         | 0,1      |          | 0,1    | 0        | 0,363333 | 0,055076 | 0,1      | 0        |
| Spathulenol                                            | SPAT         | 1,963333 | 0,211975 | 1,925  | 0,095743 | 1,085    | 0,025981 | 1,075    | 0,095743 |
| Salvial-4(14)-en-1-one                                 | SAL          | 0,215    | 0,094692 | 0,25   | 0,057735 | nd       |          | 0,1      | 0        |
| Bisaboladien-4-ol<2,7Z->                               | BIS          | 0,245    | 0,098826 | 0,325  | 0,05     | nd       |          | 0,276667 | 0,040415 |
| Gossonorol                                             | GOS          | 0,2      |          | 0,1    | 1,70E-17 | 0,7      | 0,128582 | 0,1      | 0        |

Muurolol&lt;alpha-&gt;

|                             |       |          |          |        |          |          |          |        |          |
|-----------------------------|-------|----------|----------|--------|----------|----------|----------|--------|----------|
| (=Torreyol)                 | TORR  | 0,146667 | 0,056862 | 0,225  | 0,05     | nd       |          | 0,2    | 0        |
| Bisabolol oxide B           | BIOB  | 23,165   | 1,279727 | 19,875 | 0,457347 | 21,735   | 0,979575 | 19,325 | 0,78475  |
| Bisabolone oxide A          | BIOA  | 9,725    | 1,332604 | 9,275  | 1,017759 | 8,82     | 0,85806  | 7,775  | 0,368556 |
| Bisabolol<epi-alpha->       | EPIAB | 0,3      |          | nd     |          | 2,2      | 0        | nd     |          |
| Bisabolol<alpha->           | ABOL  |          |          | nd     |          | 0,3      | 0        | nd     |          |
| Farnesol<2Z,6Z->            | FAR   |          |          | nd     |          | nd       |          | nd     |          |
| Chamazulene                 | CHAM  | 4,305    | 0,661337 | 3,175  | 0,386221 | 1,5375   | 0,242813 | 2,9    | 0,374166 |
| Bisabolol oxide A <alpha->  | ABOLA | 23,0475  | 2,574327 | 19,575 | 1,662077 | 21,1975  | 1,361381 | 24,325 | 1,798842 |
| Costol<alpha->              | ACOS  | 0,1      |          | 0,1    | 0        | nd       |          | nd     |          |
| Spiroether<Z->              | ZSPI  | 11,6     | 1,392456 | 13,025 | 1,281601 | 7,345    | 1,470635 | 9,725  | 2,389386 |
| Spiroether<E->              | ESPI  | 0,385    | 0,304056 | 0,225  | 0,095743 | 0,2      | 0        | 0,2    | 0        |
| Methyl hexadecanoate        | MHEX  | nd       |          | 0,1    | 0        | nd       |          | nd     |          |
| (E)-Tibetin spiroether      | ETIB  | 0,325    | 0,152862 | 0,575  | 0,095743 | 0,316667 | 0,076376 | 0,65   | 0,1      |
| (2E,6E)-Farnesyl pentanoate | FARP  | nd       |          | 0,1    | 0        | nd       |          | 0,1    | 0        |
| Methyl linoleate            | MLIN  | nd       |          | 0,1    | 0        | nd       |          | nd     |          |
| Linoleic acid               | LIN   | 0,216667 | 0,104083 | 0,4    | 0,08165  | nd       |          | 0,1    | 0        |
| Tricosane<n->               | TRIC  | 0,455    | 0,205061 | 0,1    | 0        | nd       |          | 0,1    | 0        |
| Pentacosane                 | PENT  | 0,3025   | 0,148408 | 0,5    | 0,141421 | 0,323333 | 0,040415 | 0,6    | 0,270801 |
